# Supplementary material
Source: PubMed Central journal article supplement (PMC4410765)
Supplement: NIHMS678640-supplement-Supplemental.pdf [file NIHMS678640-supplement-Supplemental.pdf]

| GI#      | Protein                                   | Intensity 4°C | Intensity 37°C |
|----------|-------------------------------------------|---------------|----------------|
| 16409420 | lmo0061                                   | 6.6858        |                |
| 16409456 | lmo0097                                   |               | 6.7747         |
| 16409516 | lmo0157                                   |               | 7.4259         |
| 16409562 | lmo0197                                   | 6.4453        |                |
| 16409564 | phosphoribosyl pyrophosphate synthetase   | 6.5709        | 7.0162         |
| 16409569 | actin-assembly inducing protein precursor | 5.5168        |                |
| 16409575 | ldh                                       | 6.9612        |                |
| 16409576 | ctc                                       | 0.0000        | 7.3261         |
| 16409588 | cysK                                      | 6.6110        | 7.4576         |
| 16409628 | internalin H                              | 5.9410        | 6.9060         |
| 16409653 | lmo0288                                   | 7.0717        | 0.0000         |
| 16409725 | lmo0347                                   | 0.0000        | 6.6876         |
| 16409748 | lmo0370                                   | 0.0000        |                |
| 16409901 | lmo0525                                   | 0.0000        | 6.7181         |
| 16409932 | lmo0556                                   |               | 6.8841         |
| 16409952 | lmo0576                                   | 6.4446        |                |
| 16409964 | lmo0588                                   |               |                |
| 16409989 | lmo0600                                   | 0.0000        |                |
| 16409998 | lmo0609                                   | 0.0000        | 7.1688         |
| 16410014 | lmo0625                                   | 6.3232        | 7.0955         |
| 16410025 | lmo0636                                   | 0.0000        |                |
| 16410044 | lmo0655                                   | 7.6399        | 7.0793         |
| 16410165 | lmo0776                                   | 6.6988        | 0.0000         |
| 16410170 | lmo0781                                   | 6.3774        | 0.0000         |
| 16410203 | lmo0814                                   |               | 4.7753         |
| 16410214 | lmo0825                                   | 6.2995        | 6.8307         |
| 16410266 | lmo0863                                   | 0.0000        | 7.2130         |
| 16410276 | lmo0873                                   | 5.7794        |                |
| 16410404 | PTS phosphocarrier protein Hpr            | 6.6204        |                |
| 16410405 | phosphotransferase system enzyme I        |               | 6.0000         |
| 16410413 | lmo1011                                   | 6.3101        | 6.9614         |
| 16410414 | lmo1012                                   | 5.0345        |                |
| 16410421 | lmo1019                                   | 0.0000        | 5.1228         |
| 16410461 | lmo1059                                   |               |                |
| 16410477 | lmo1075                                   | 6.6428        | 6.0907         |
| 16410501 | lmo1099                                   | 6.2822        |                |
| 16410514 | lmo1112                                   | 6.9126        | 0.0000         |
| 16410548 | lmo1132                                   | 7.6957        | 7.1169         |
| 16410577 | lmo1161                                   |               |                |
| 16410639 | lmo1223                                   | 6.8358        | 6.1624         |
| 16410642 | lmo1226                                   |               | 7.1084         |
| 16410644 | rnhC                                      | 0.0000        | 7.2245         |

|          |                                           |        |        |
|----------|-------------------------------------------|--------|--------|
| 16410704 | lmo1288                                   | 0.0000 | 7.3213 |
| 16802745 | hypothetical protein lmo0703              |        | 5.3450 |
| 16410706 | lmo1290                                   | 6.5642 |        |
| 16410718 | lmo1302                                   | 7.4147 |        |
| 16410787 | lmo1371                                   | 0.0000 | 6.6942 |
| 16410800 | lmo1384                                   | 0.0000 | 6.6241 |
| 16410801 | lmo1385                                   |        | 6.9227 |
| 16410827 | Recombination protein recA                |        | 6.7226 |
| 16410832 | DNA mismatch repair (recognition)         | 7.0763 |        |
| 16410835 | pyruvate formate-lyase                    | 0.0000 | 6.8677 |
| 16410842 | peptidoglycan bound protein (LPXTG motif) |        | 0.0000 |
| 16410872 | lmo1443                                   | 0.0000 |        |
| 16410887 | glyS                                      | 0.0000 | 7.0592 |
| 16410949 | histidyl-tRNA synthetase                  | 7.1119 | 6.1159 |
| 16410962 | ruvA                                      | 0.0000 |        |
| 16410967 | lmo1538                                   | 0.0000 | 7.0740 |
| 16410988 | threonyl-tRNA synthetase                  | 6.9629 | 0.0000 |
| 16410994 | DNA polymerase I                          | 6.8723 |        |
| 16411020 | argC                                      | 6.4665 | 7.3465 |
| 16411053 | lmo1617                                   |        |        |
| 16411109 | menB                                      |        |        |
| 16411111 | menD                                      |        |        |
| 16411113 | lmo1677                                   | 0.0000 | 7.0988 |
| 16411144 | lmo1690                                   | 6.5959 | 6.6822 |
| 16411165 | lmo1711                                   | 0.0000 | 7.2754 |
| 16411174 | lmo1720                                   | 0.0000 | 7.0617 |
| 16411176 | lmo1722                                   |        | 6.7176 |
| 16411208 | glutamyl-tRNA(Gln) amidotransferase B     |        | 0.0000 |
| 16411221 | phosphoribosylaminoimidazole synthetase   | 5.9598 | 6.8539 |
| 16411240 | internalin C                              | 0.0000 | 7.1188 |
| 16411274 | lmo1820                                   | 0.0000 |        |
| 16411289 | pyrAB                                     |        |        |
| 16411320 | lmo1866                                   | 6.9288 |        |
| 16411336 | lmo1883                                   |        | 5.9490 |
| 16411376 | aroE                                      | 0.0000 | 6.6889 |
| 16411387 | hup                                       |        | 6.8885 |
| 16411391 | lmo1938                                   | 0.0000 | 7.2805 |
| 16411395 | recS                                      |        |        |
| 16411407 | drm                                       | 5.1172 |        |
| 16411443 | leuD                                      | 7.7082 | 0.0000 |
| 16411454 | lmo2001                                   |        |        |
| 16411468 | lmo2015                                   | 5.7918 |        |
| 16411502 | ftsZ                                      | 7.0514 |        |

|          |                                   |        |        |
|----------|-----------------------------------|--------|--------|
| 16411503 | ftsA                              |        |        |
| 16411514 | lmo2044                           |        |        |
| 16411545 | lmo2075                           |        | 5.1507 |
| 16411560 | argG                              | 0.0000 | 6.5992 |
| 16411565 | lmo2095                           | 0.0000 |        |
| 16411587 | lmo2117                           |        |        |
| 16411611 | lmo2141                           |        | 0.0000 |
| 16411629 | lmo2159                           |        | 6.5160 |
| 16411633 | lmo2163                           | 0.0000 | 6.4655 |
| 16411654 | lmo2184                           |        | 0.0000 |
| 16411666 | lmo2196                           | 6.6197 |        |
| 16411705 | lmo2235                           | 6.8096 |        |
| 16411738 | addB                              |        |        |
| 16411753 | protein gp20 [Bacteriophage A118] |        |        |
| 16411783 | lmo2313                           | 6.7270 | 0.0000 |
| 16411818 | lmo2329                           | 5.8995 | 0.0000 |
| 16411823 | fruA                              | 6.4731 | 7.6951 |
| 16411848 | transmembrane protein             | 5.3811 | 6.7145 |
| 16411858 | lmo2370                           | 6.7277 |        |
| 16411864 | lmo2376                           | 0.0000 | 7.0392 |
| 16411869 | lmo2381                           | 0.0000 |        |
| 16411878 | lmo2390                           | 6.4352 | 0.0000 |
| 16411902 | lmo2414                           | 6.9243 |        |
| 16411936 | lmo2448                           |        |        |
| 16411943 | eno                               | 0.0000 |        |
| 16411947 | gap                               | 7.2901 |        |
| 16411951 | lmo2463                           |        | 7.0511 |
| 16411971 | HPr-P(Ser) kinase/phosphatase     |        | 6.2245 |
| 16411984 | lmo2496                           | 6.2412 |        |
| 16411999 | lmo2511                           |        | 0.0000 |
| 16412001 | comFA                             | 4.8735 | 6.3798 |
| 16412008 | lmo2520                           | 7.3079 | 0.0000 |
| 16412010 | lmo2522                           | 0.0000 |        |
| 16412018 | atpG                              | 0.0000 | 6.7863 |
| 16412019 | atpA                              | 6.6325 | 7.5308 |
| 16412022 | atpE                              | 0.0000 |        |
| 16412034 | thrC                              | 6.9294 |        |
| 16412046 | autolysin, amidase                | 6.8732 |        |
| 16412065 | lmo2577                           | 6.4196 |        |
| 16412074 | lmo2586                           |        | 7.7821 |
| 16412089 | lmo2601                           | 0.0000 | 6.3839 |
| 16412102 | ribosomal protein L30             | 6.2986 | 7.4704 |
| 16412112 | ribosomal protein L29             |        | 0.0000 |

|          |                                                 |        |        |
|----------|-------------------------------------------------|--------|--------|
| 16412124 | lmo2636                                         |        |        |
| 16412162 | lmo2662                                         | 6.7400 |        |
| 16412171 | lmo2671                                         | 0.0000 | 6.6979 |
| 16412240 | lmo2740                                         | 5.6088 |        |
| 16412249 | lmo2749                                         | 0.0000 |        |
| 16412270 | lmo2770                                         | 0.0000 | 6.9275 |
| 16412311 | lmo2811                                         | 6.4817 |        |
| 16412325 | serC                                            | 6.2299 |        |
| 16802055 | DNA gyrase subunit A                            |        | 0.0000 |
| 16802061 | AA3-600 quinol oxidase subunit II               | 6.1254 | 6.6119 |
| 16802062 | AA3-600 quinol oxidase subunit I                |        |        |
| 16802066 | beta-glucosidase                                |        |        |
| 16802073 | hypothetical protein lmo0025                    | 6.7267 | 0.0000 |
| 16802093 | hypothetical protein lmo0045                    | 6.0229 |        |
| 16802095 | hypothetical protein lmo0047                    | 6.4510 |        |
| 16802132 | hypothetical protein lmo0084                    |        | 5.5581 |
| 16802136 | hypothetical protein lmo0088                    | 7.1325 | 0.0000 |
| 16802154 | hypothetical protein lmo0106                    |        | 0.0000 |
| 16802166 | antigen A                                       | 4.7242 |        |
| 16802169 | hypothetical protein lmo0121                    | 6.7460 | 0.0000 |
| 16802183 | hypothetical protein lmo0135                    | 6.9022 | 7.6062 |
| 16802207 | peptidoglycan binding protein                   | 0.0000 |        |
| 16802223 | methionyl-tRNA synthetase                       | 0.0000 |        |
| 16802228 | hypothetical protein lmo0182                    | 7.0211 |        |
| 16802241 | hypothetical protein lmo0195                    | 6.4449 |        |
| 16802264 | hypothetical protein lmo0218                    | 6.8744 |        |
| 16802266 | hypothetical protein lmo0220                    |        | 6.6496 |
| 16802294 | 50S ribosomal protein L11                       | 0.0000 | 6.3054 |
| 16802303 | hypothetical protein lmo0257                    | 7.1588 | 6.2788 |
| 16802305 | DNA-directed RNA polymerase subunit beta        |        | 7.5419 |
| 16802315 | hypothetical protein lmo0269                    | 0.0000 | 6.1445 |
| 16802325 | anaerobic ribonucleoside triphosphate reductase | 6.2082 |        |
| 16802361 | hydroxyethylthiazole kinase                     | 6.7534 | 0.0000 |
| 16802369 | hypothetical protein lmo0324                    | 6.6886 |        |
| 16802412 | hypothetical protein lmo0367                    |        |        |
| 16802459 | hypothetical protein lmo0415                    | 6.6927 |        |
| 16802491 | hypothetical protein lmo0447                    |        |        |
| 16802524 | hypothetical protein lmo0481                    |        | 6.4711 |
| 16802536 | hypothetical protein lmo0493                    | 0.0000 | 6.4964 |
| 16802537 | hypothetical protein lmo0494                    | 0.0000 | 6.9568 |
| 16802579 | hypothetical protein lmo0536                    | 0.0000 |        |
| 16802625 | lap                                             | 0.0000 |        |
| 16802674 | putative fructose-like permease EIIc subunit 2  | 0.0000 |        |

|          |                                                            |        |        |
|----------|------------------------------------------------------------|--------|--------|
| 16802675 | putative fructose-like phosphotransferase EII <sub>B</sub> | 0.0000 | 6.4162 |
| 16802687 | hypothetical protein Imo0645                               |        | 0.0000 |
| 16802755 | flagellar MS-ring protein                                  |        |        |
| 16802871 | hypothetical protein Imo0829                               | 6.3269 |        |
| 16802939 | hypothetical protein Imo0898                               | 6.1063 | 6.6466 |
| 16802966 | hypothetical protein Imo0926                               | 6.4323 | 5.5877 |
| 16803040 | hypothetical protein Imo1000                               |        | 6.6863 |
| 16803089 | hypothetical protein Imo1049                               | 5.3956 | 6.6097 |
| 16803102 | hypothetical protein Imo1062                               |        | 6.5914 |
| 16803112 | pyruvate carboxylase                                       | 7.6587 |        |
| 16803117 | hypothetical protein Imo1077                               | 0.0000 | 6.0991 |
| 16803122 | hypothetical protein Imo1082                               | 5.0676 |        |
| 16803156 | hypothetical protein Imo1116                               | 6.4253 | 0.0000 |
| 16803186 | hypothetical protein Imo1146                               |        |        |
| 16803209 | threonine-phosphate decarboxylase                          | 6.5013 |        |
| 16803211 | hypothetical protein Imo1171                               | 6.8034 | 5.9597 |
| 16803212 | hypothetical protein Imo1172                               | 7.0067 | 0.0000 |
| 16803215 | hypothetical protein Imo1175                               | 6.7624 | 5.7603 |
| 16803219 | hypothetical protein Imo1179                               | 6.9123 |        |
| 16803231 | cobyrinic acid a,c-diamide synthase                        |        | 6.2190 |
| 16803233 | precorrin-8X methylmutase                                  |        | 7.1034 |
| 16803257 | hypothetical protein Imo1217                               |        |        |
| 16803264 | hypothetical protein Imo1224                               |        |        |
| 16803271 | hypothetical protein Imo1231                               | 6.6778 | 7.3774 |
| 16803281 | hypothetical protein Imo1241                               |        | 7.4515 |
| 16803320 | transcriptional repressor CodY                             | 5.1398 | 6.4832 |
| 16803329 | hypothetical protein Imo1289                               |        |        |
| 16803349 | hypothetical protein Imo1309                               | 0.0000 |        |
| 16803358 | hypothetical protein Imo1318                               | 6.4730 | 5.2204 |
| 16803362 | transcription elongation factor NusA                       | 0.0000 | 7.1009 |
| 16803368 | hypothetical protein Imo1328                               | 6.2024 | 7.0769 |
| 16803371 | polynucleotide phosphorylase                               | 7.9995 | 7.4260 |
| 16803394 | hypothetical protein Imo1354                               | 0.0000 |        |
| 16803400 | hypothetical protein Imo1360                               | 6.4236 | 7.0008 |
| 16803416 | 6-phosphogluconate dehydrogenase                           | 6.7825 |        |
| 16803423 | isopentenyl pyrophosphate isomerase                        |        | 6.5966 |
| 16803429 | hypothetical protein Imo1389                               | 6.8899 | 0.0000 |
| 16803455 | hypothetical protein Imo1415                               | 6.7029 |        |
| 16803464 | manganese transport protein MntH                           | 6.3923 |        |
| 16803474 | hypothetical protein Imo1434                               | 8.2619 | 4.9092 |
| 16803479 | superoxide dismutase                                       | 7.4861 | 7.9153 |
| 16803512 | heat shock protein DnaJ                                    | 5.5062 | 7.2165 |
| 16803513 | DnaK                                                       | 6.5370 | 7.9349 |

|          |                                          |        |        |
|----------|------------------------------------------|--------|--------|
| 16803523 | hypothetical protein Imo1483             | 6.8997 | 6.2393 |
| 16803524 | hypothetical protein Imo1484             |        | 0.0000 |
| 16803545 | hypothetical protein Imo1505             | 6.0356 |        |
| 16803546 | hypothetical protein Imo1506             |        |        |
| 16803610 | pyruvate kinase                          | 6.9556 |        |
| 16803613 | acetyl-CoA carboxylase subunit beta      |        | 6.5744 |
| 16803617 | hypothetical protein Imo1577             | 0.0000 |        |
| 16803641 | hypothetical protein Imo1601             | 0.0000 | 7.0910 |
| 16803643 | hypothetical protein Imo1603             | 7.0441 |        |
| 16803647 | hypothetical protein Imo1607             | 0.0000 |        |
| 16803651 | hypothetical protein Imo1611             | 6.1586 | 7.0352 |
| 16803660 | dipeptidase PepV                         | 6.3184 | 7.9841 |
| 16803667 | tryptophan synthase subunit alpha        | 7.2173 | 0.0000 |
| 16803674 | acetaldehyde-CoA/alcohol dehydrogenase   | 6.3356 |        |
| 16803678 | hypothetical protein Imo1638             | 0.0000 |        |
| 16803697 | elongation factor Ts                     | 5.1279 |        |
| 16803704 | S-adenosylmethionine synthetase          | 0.0000 |        |
| 16803787 | hypothetical protein Imo1747             | 6.6646 |        |
| 16803859 | ribosome-associated GTPase               | 0.0000 |        |
| 16803870 | short chain dehydrogenase                | 0.0000 | 6.4865 |
| 16803877 | dihydroorotase                           | 5.5521 |        |
| 16803907 | pyruvate phosphate dikinase              |        | 6.5881 |
| 16803936 | aspartate aminotransferase               |        |        |
| 16803957 | hypothetical protein Imo1918             |        | 0.0000 |
| 16803967 | chorismate synthase                      |        |        |
| 16803970 | ubiquinone/menaquinone methyltransferase |        |        |
| 16803986 | hypothetical protein Imo1947             |        |        |
| 16804022 | dihydroxy-acid dehydratase               | 6.7569 | 5.9028 |
| 16804026 | 2-isopropylmalate synthase               | 6.4251 | 0.0000 |
| 16804027 | 3-isopropylmalate dehydrogenase          |        | 6.5749 |
| 16804069 | hypothetical protein Imo2030             | 4.6233 |        |
| 16804118 | hypothetical protein Imo2079             |        |        |
| 16804128 | hypothetical protein Imo2089             | 5.6640 |        |
| 16804142 | phosphotransacetylase                    | 6.1527 | 7.4961 |
| 16804167 | hypothetical protein Imo2128             | 6.4056 | 0.0000 |
| 16804184 | hypothetical protein Imo2145             | 6.5690 |        |
| 16804211 | hypothetical protein Imo2172             | 7.4879 |        |
| 16804224 | hypothetical protein Imo2185             | 6.6990 | 0.0000 |
| 16804227 | hypothetical protein Imo2188             | 6.6297 |        |
| 16804244 | hypothetical protein Imo2205             |        | 8.1265 |
| 16804258 | hypothetical protein Imo2219             | 5.6330 |        |
| 16804260 | hypothetical protein Imo2221             | 7.3530 |        |
| 16804277 | hypothetical protein Imo2238             | 6.5181 | 0.0000 |

|           |                                               |        |        |
|-----------|-----------------------------------------------|--------|--------|
| 16804303  | hypothetical protein Imo2264                  |        | 0.0000 |
| 16804306  | hypothetical protein Imo2267                  | 0.0000 | 0.0000 |
| 16804326  | putative tape-measure                         | 5.5316 | 7.5159 |
| 16804366  | hypothetical protein Imo2327                  | 0.0000 | 6.8202 |
| 16804374  | fructose-1-phosphate kinase                   | 5.9542 |        |
| 16804392  | hypothetical protein Imo2354                  | 6.2124 |        |
| 16804405  | glucose-6-phosphate isomerase                 | 0.0000 |        |
| 16804426  | hypothetical protein Imo2388                  | 0.0000 |        |
| 16804434  | hypothetical protein Imo2396                  |        |        |
| 16804494  | phosphoglyceromutase                          | 7.4374 |        |
| 16804496  | phosphoglycerate kinase                       | 4.8207 |        |
| 16804529  | hypothetical protein Imo2491                  |        | 6.7433 |
| 16804537  | hypothetical protein Imo2499                  |        |        |
| 16804567  | F0F1 ATP synthase subunit beta                | 6.7246 | 7.6758 |
| 16804581  | peptide chain release factor 1                | 6.1543 |        |
| 16804586  | 50S ribosomal protein L31 type B              | 6.5147 | 7.3646 |
| 16804649  | hypothetical protein Imo2611                  | 6.5162 |        |
| 16804655  | 50S ribosomal protein L6                      | 6.7922 |        |
| 16804675  | hypothetical protein Imo2637                  | 7.2367 | 7.7321 |
| 16804685  | hypothetical protein Imo2648                  |        | 0.0000 |
| 16804701  | hypothetical protein Imo2664                  | 5.9253 |        |
| 16804709  | hypothetical protein Imo2672                  | 6.4594 | 5.4877 |
| 16804719  | potassium-transporting ATPase subunit A       | 6.3630 | 0.0000 |
| 16804720  | hypothetical protein Imo2683                  | 0.0000 |        |
| 16804724  | hypothetical protein Imo2687                  | 7.2647 | 0.0000 |
| 16804726  | hypothetical protein Imo2689                  | 4.5729 | 6.7952 |
| 16804762  | hypothetical protein Imo2725                  |        | 5.7824 |
| 16804788  | hypothetical protein Imo2751                  |        |        |
| 16804789  | hypothetical protein Imo2752                  | 7.4310 | 5.5495 |
| 16804791  | hypothetical protein Imo2754                  | 0.0000 | 7.1880 |
| 16804794  | hypothetical protein Imo2757                  |        | 4.9159 |
| 16804796  | hypothetical protein Imo2759                  |        | 5.5538 |
| 16804801  | hypothetical protein Imo2764                  | 0.0000 |        |
| 16804818  | hypothetical protein Imo2781                  | 7.3414 | 6.1402 |
| 16804838  | N-acetylmannosamine-6-phosphate 2-epimerase   | 6.8677 | 5.8942 |
| 16804847  | gidA                                          |        |        |
| 16804882  | hypothetical protein Imo2845                  | 0.0000 | 6.5759 |
| 18140806  | EII <sup>Mant</sup> PTS permease IIAB subunit | 0.0000 |        |
| 227478797 | unnamed protein product                       | 4.4422 |        |
| 253777894 | unnamed protein product                       |        |        |
| 301598825 | aorA                                          | 7.0069 | 0.0000 |

| Intensity 4°C-Salt | Intensity 37°C-Salt | P value 4°C to 37°C | P-value 4°C to 4°C Salt |
|--------------------|---------------------|---------------------|-------------------------|
| 5.2397             |                     |                     | 0.0474                  |
|                    | 4.5423              |                     |                         |
|                    | 0.0000              |                     |                         |
| 7.3263             |                     |                     | 0.0212                  |
|                    | 5.8420              | 0.0081              |                         |
| 7.1229             |                     |                     | 0.0164                  |
| 7.9398             |                     |                     | 0.0033                  |
| 6.8294             |                     | 0.0109              | 0.0361                  |
|                    |                     | 0.0202              |                         |
|                    |                     | 0.0008              |                         |
| 0.0000             |                     | 0.0216              | 0.0215                  |
|                    | 0.0000              | 0.0020              |                         |
| 7.8801             |                     |                     | 0.0242                  |
| 6.8557             |                     | 0.0000              | 0.0061                  |
| 6.5850             | 0.0000              |                     |                         |
| 7.8056             | 5.2354              |                     | 0.0098                  |
| 0.0000             | 6.5368              |                     |                         |
| 6.5011             | 0.0000              |                     | 0.0000                  |
|                    | 0.0000              | 0.0122              |                         |
|                    | 0.0000              | 0.0401              |                         |
| 6.4856             | 0.0000              |                     | 0.0051                  |
| 8.0130             | 6.6263              | 0.0392              |                         |
|                    |                     | 0.0147              |                         |
| 4.6880             |                     | 0.0295              | 0.0323                  |
|                    | 6.4028              |                     |                         |
|                    | 0.0000              | 0.0157              |                         |
|                    | 5.9871              | 0.0089              |                         |
| 0.0000             |                     |                     | 0.0360                  |
| 8.2533             |                     |                     | 0.0327                  |
| 6.8722             | 7.6487              |                     |                         |
|                    | 6.4276              | 4.56E-05            |                         |
| 5.7760             |                     |                     | 0.0352                  |
|                    |                     | 0.0080              |                         |
| 6.1820             | 7.5261              |                     |                         |
|                    |                     | 0.0290              |                         |
| 0.0000             |                     |                     | 0.0293                  |
|                    |                     | 0.0470              |                         |
| 5.8907             |                     | 0.0469              | 0.0062                  |
| 0.0000             | 6.4624              |                     |                         |
|                    |                     | 0.0168              |                         |
| 7.0663             | 0.0000              |                     |                         |
|                    |                     | 0.0100              |                         |



|        |        |          |        |
|--------|--------|----------|--------|
|        | 0.0000 | 0.0096   |        |
|        | 6.1335 |          |        |
| 4.1174 |        |          | 0.0002 |
| 6.2958 |        |          | 0.0001 |
| 7.1144 |        | 0.0228   | 0.0216 |
|        |        | 0.0102   |        |
|        | 0.0000 |          |        |
|        | 0.0000 |          |        |
| 7.8285 | 6.8644 |          | 0.0287 |
| 7.7523 |        | 0.0100   | 0.0498 |
| 0.0000 | 7.2007 |          |        |
| 6.1762 |        |          | 0.0371 |
|        | 5.2545 | 0.0265   |        |
| 0.0000 |        | 0.0389   | 0.0233 |
| 6.7651 | 5.5560 |          | 0.0354 |
|        | 0.0000 | 0.0101   |        |
| 5.2213 |        | 0.0349   | 0.0374 |
| 5.6347 |        |          | 0.0118 |
|        | 0.0000 | 0.0299   |        |
| 7.2640 | 6.5801 |          |        |
| 0.0000 | 7.2882 |          |        |
| 6.5750 | 0.0000 |          |        |
|        | 0.0000 | 0.0096   |        |
| 5.4403 | 3.9222 |          | 0.0196 |
|        | 6.3110 | 4.83E-05 |        |
|        | 5.7445 | 0.0325   |        |
|        | 5.6479 |          |        |
|        | 6.6142 |          |        |
|        | 5.4345 | 0.0118   |        |
| 6.7818 |        | 0.0003   | 0.0448 |
| 7.0216 |        |          | 0.0169 |
| 7.0540 | 0.0000 |          |        |
| 6.4104 | 7.0061 |          | 0.0375 |
| 6.4449 | 7.2066 |          |        |
|        |        | 0.0045   |        |
|        | 5.0283 |          |        |
|        |        | 0.0126   |        |
| 6.5471 | 0.0000 |          |        |
| 7.7811 | 6.8321 |          | 0.0099 |
| 5.5451 |        | 0.0089   | 0.0092 |
| 6.5757 | 0.0000 |          |        |
| 6.6137 | 0.0000 |          | 0.0374 |
| 6.2807 |        |          | 0.0327 |

|        |        |          |        |
|--------|--------|----------|--------|
| 6.7043 | 0.0000 |          |        |
| 7.5163 | 5.8352 |          |        |
|        | 6.4445 |          |        |
| 7.5140 | 6.4491 | 4.09E-06 | 0.0149 |
| 6.7230 | 0.0000 |          | 0.0111 |
| 5.9382 | 0.0000 |          |        |
|        | 6.5119 |          |        |
|        | 5.2498 |          |        |
|        |        | 0.0227   |        |
| 0.0000 | 6.3280 |          |        |
| 7.8619 |        |          | 0.0474 |
| 7.4099 | 6.7804 |          | 0.0414 |
| 6.7314 | 5.8742 |          |        |
| 6.3662 | 4.9735 |          |        |
| 0.0000 |        | 0.0276   | 0.0276 |
|        |        | 0.0089   |        |
| 7.9466 |        | 0.0064   | 0.0450 |
|        |        | 0.0041   |        |
| 0.0000 |        |          | 0.0136 |
|        |        | 0.0010   |        |
| 6.4311 | 0.0000 |          | 0.0107 |
|        |        | 0.0251   |        |
| 7.6740 | 6.8930 |          | 0.0495 |
| 7.6532 | 6.1131 |          |        |
| 7.4834 |        |          | 0.0217 |
| 8.5794 |        |          | 0.0070 |
|        | 0.0000 |          |        |
|        | 5.6024 |          |        |
| 7.7316 | 0.0000 |          | 0.0232 |
|        | 7.3762 |          |        |
|        |        | 0.0429   |        |
| 0.0000 |        | 0.0000   | 0.0000 |
| 7.0504 |        |          | 0.0312 |
|        | 0.0000 | 0.0294   |        |
| 8.3146 |        | 0.0450   | 0.0266 |
| 6.6495 | 5.9374 |          | 0.0134 |
| 8.3081 |        |          | 0.0187 |
| 6.1069 |        |          | 0.0465 |
| 0.0000 |        |          | 0.0199 |
|        | 6.2861 |          |        |
|        | 0.0000 | 0.0214   |        |
| 7.2308 |        | 0.0001   | 0.0251 |
| 0.0000 | 6.9926 |          |        |

|        |        |        |          |
|--------|--------|--------|----------|
| 7.3271 | 6.1471 |        |          |
| 5.1173 |        |        | 0.0086   |
|        | 0.0000 | 0.0114 |          |
| 6.6105 |        |        | 4.18E-05 |
| 7.2733 | 0.0000 |        | 0.0166   |
|        |        | 0.0151 |          |
| 7.4959 | 5.5128 |        | 0.0088   |
| 7.4518 |        |        | 0.0076   |
|        | 7.0081 |        |          |
|        | 0.0000 | 0.0160 |          |
| 7.1047 | 0.0000 |        |          |
| 7.0558 | 0.0000 |        |          |
| 5.9659 |        | 0.0112 | 0.0362   |
| 7.5454 | 5.9570 |        | 0.0430   |
| 7.4603 | 6.4283 |        | 0.0194   |
| 0.0000 | 6.7887 |        |          |
|        |        | 0.0125 |          |
| 6.1553 | 6.7624 |        |          |
| 6.5650 |        |        | 0.0080   |
| 0.0000 |        | 0.0016 | 0.0015   |
|        |        | 0.0142 |          |
| 7.0563 | 0.0000 |        | 0.0140   |
| 6.1184 | 5.0938 |        | 0.0039   |
| 5.4363 |        |        | 0.0203   |
| 0.0000 |        |        | 0.0444   |
| 8.0858 |        |        | 0.0192   |
|        | 6.0562 |        |          |
|        |        | 0.0129 |          |
|        |        | 0.0346 |          |
|        | 6.9826 |        |          |
|        | 0.0000 | 0.0490 |          |
| 6.8456 |        |        | 0.0160   |
|        |        | 0.0128 |          |
| 0.0000 |        |        | 0.0162   |
| 7.3296 | 6.0228 |        |          |
| 0.0000 | 6.6678 |        | 0.0388   |
| 5.0575 | 6.4716 |        |          |
|        | 0.0000 |        |          |
|        | 5.7499 | 0.0076 |          |
|        | 5.8241 | 0.0095 |          |
| 7.0197 |        |        | 0.0030   |
| 6.8360 |        |        | 0.0206   |
| 7.2327 | 0.0000 |        | 0.0108   |

|        |        |        |          |
|--------|--------|--------|----------|
|        | 0.0000 | 0.0231 |          |
| 0.0000 | 6.3805 |        |          |
| 0.0000 | 6.6561 |        |          |
| 5.6904 |        |        | 0.0077   |
| 7.4849 | 0.0000 | 0.0028 | 0.0499   |
|        |        | 0.0372 |          |
|        | 5.9551 |        |          |
|        | 0.0000 | 0.0389 |          |
| 6.5034 | 0.0000 |        |          |
| 0.0000 |        |        | 0.0167   |
|        |        | 0.0099 |          |
| 7.8338 |        |        | 0.0182   |
| 0.0000 |        | 0.0080 | 0.0080   |
| 7.1672 | 5.8668 |        |          |
| 0.0000 |        |        | 0.0192   |
| 6.0998 |        | 0.0345 | 0.0486   |
| 5.9146 |        | 0.0000 | 5.41E-06 |
| 5.5218 |        | 0.0326 | 0.0258   |
| 7.6642 | 0.0000 |        | 0.0027   |
| 0.0000 | 7.4792 |        |          |
|        | 0.0000 |        |          |
| 0.0000 | 6.7576 |        |          |
| 6.5370 | 0.0000 |        |          |
| 0.0000 |        | 0.0411 | 0.0057   |
|        | 0.0000 |        |          |
|        | 0.0000 | 0.0394 |          |
| 6.2332 | 0.0000 |        |          |
| 6.4560 | 5.4576 |        | 0.0190   |
|        |        | 0.0283 |          |
|        | 6.0601 | 0.0169 |          |
|        | 0.0000 | 0.0007 |          |
| 7.3511 |        | 0.0462 | 0.0369   |
| 7.4421 |        |        | 0.0093   |
|        | 0.0000 | 0.0373 |          |
| 8.2542 | 7.6424 |        | 0.0092   |
|        | 0.0000 |        |          |
| 0.0000 |        | 0.0160 | 0.0160   |
| 5.4241 |        |        | 0.0113   |
| 0.0000 |        |        | 0.0020   |
|        |        | 0.0181 |          |
|        | 7.4343 | 0.0389 |          |
|        |        | 0.0109 |          |
|        | 7.1919 | 0.0012 |          |

|        |        |          |          |
|--------|--------|----------|----------|
| 0.0000 |        | 0.0180   | 0.0011   |
| 0.0000 | 6.5147 |          |          |
| 7.0098 | 0.0000 |          | 0.0169   |
| 6.9104 | 0.0000 |          |          |
| 8.6512 |        |          | 0.0099   |
|        | 4.9818 |          |          |
| 6.9766 | 0.0000 |          | 0.0221   |
| 0.0000 | 7.2442 | 0.0005   |          |
| 6.1150 |        |          | 0.0326   |
| 6.2381 | 0.0000 |          | 1.20E-10 |
| 0.0000 | 7.2534 | 0.0198   |          |
| 8.1506 |        | 0.0231   | 0.0091   |
|        |        | 0.0097   |          |
| 8.0228 |        |          | 0.0088   |
| 6.7997 |        |          | 0.0083   |
| 7.5649 |        |          | 0.0088   |
| 7.4543 | 6.0209 |          | 0.0373   |
| 0.0000 |        |          | 0.0072   |
| 6.3965 | 5.6442 |          | 0.0082   |
|        |        | 0.0088   |          |
| 6.8805 |        |          | 0.0313   |
|        | 7.0393 |          |          |
| 5.2606 | 6.5440 |          |          |
|        | 6.9121 |          |          |
| 6.3031 | 6.9362 |          |          |
| 6.7239 | 0.0000 |          |          |
| 0.0000 | 6.1857 |          |          |
| 0.0000 | 6.5999 | 0.0249   | 0.0091   |
| 0.0000 |        | 0.0197   | 0.0196   |
|        | 0.0000 |          |          |
| 7.0006 | 5.7210 |          | 0.0041   |
| 7.7137 | 6.1159 |          |          |
| 7.7119 | 0.0000 |          | 0.0086   |
| 7.8103 | 7.0716 | 3.71E-06 | 0.0007   |
| 0.0000 |        | 0.0072   | 0.0072   |
| 0.0000 |        |          | 0.0121   |
| 5.8432 |        |          | 0.0328   |
| 0.0000 |        | 0.0065   | 0.0064   |
| 8.1474 |        |          | 0.0101   |
|        | 6.6634 |          |          |
| 7.8584 |        |          | 0.0089   |
| 0.0000 |        |          | 0.0130   |
| 0.0000 |        | 0.0081   | 0.0082   |

|        |        |        |          |
|--------|--------|--------|----------|
| 0.0000 | 6.7324 |        |          |
| 6.8177 | 6.4622 |        | 0.0291   |
|        |        | 0.0402 |          |
|        | 0.0000 | 0.0224 |          |
| 7.0088 | 3.9846 |        | 0.0445   |
| 0.0000 |        |        | 0.0000   |
| 7.9954 |        |        | 0.0415   |
| 7.1687 | 0.0000 |        | 0.0069   |
| 6.5859 | 0.0000 |        |          |
| 8.4495 | 7.5346 |        | 0.0005   |
| 7.6283 |        |        | 0.0146   |
|        | 0.0000 |        |          |
| 6.1640 | 0.0000 |        |          |
|        |        | 0.0026 |          |
| 7.2635 |        |        | 0.0153   |
| 8.1881 |        | 0.0221 | 0.0029   |
| 7.7739 |        |        | 0.0282   |
| 8.2158 |        |        | 0.0219   |
|        |        | 0.0104 |          |
| 0.0000 | 6.5142 |        |          |
| 7.0092 | 5.1989 |        | 0.0167   |
|        |        | 0.0029 |          |
|        |        | 0.0011 |          |
| 7.3123 | 5.6812 |        | 0.0204   |
| 0.0000 |        | 0.0280 | 0.0278   |
|        |        | 0.0059 |          |
| 6.3242 | 0.0000 |        |          |
| 6.2727 | 5.8492 |        |          |
| 0.0000 |        | 0.0095 | 0.0087   |
|        |        | 0.0284 |          |
| 0.0000 | 6.4819 |        |          |
|        | 6.3340 |        |          |
| 6.8148 |        |        | 0.0432   |
|        | 6.9850 | 0.0009 |          |
|        |        | 0.0189 |          |
| 6.9081 | 5.8384 |        |          |
|        |        | 0.0099 |          |
| 7.7607 |        |        | 3.17E-08 |
| 7.6970 |        |        | 0.0177   |
| 0.0000 | 7.6656 |        |          |
| 0.0000 |        | 0.0005 | 0.0005   |

| P value 4°C salt to 37°C salt | P Value 37°C to 37°C Salt |
|-------------------------------|---------------------------|
|                               |                           |
|                               | 0.0079                    |
|                               | 0.0036                    |
|                               |                           |
|                               | 2.10E-05                  |
|                               |                           |
|                               |                           |
|                               |                           |
|                               |                           |
|                               |                           |
|                               | 0.0020                    |
|                               |                           |
|                               |                           |
| 0.0238                        | 0.0171                    |
| 0.0073                        |                           |
| 0.0180                        |                           |
| 0.0000                        |                           |
|                               | 0.0122                    |
|                               | 0.0139                    |
| 0.0050                        |                           |
| 0.0096                        | 0.0051                    |
|                               |                           |
|                               | 0.0099                    |
|                               | 3.65E-06                  |
|                               | 0.0134                    |
|                               |                           |
|                               |                           |
| 0.0412                        | 0.0176                    |
|                               | 0.0024                    |
|                               |                           |
|                               |                           |
| 0.0146                        |                           |
|                               |                           |
|                               |                           |
|                               |                           |
| 0.0074                        |                           |
|                               |                           |
| 0.0203                        | 0.0019                    |
|                               |                           |

|        |        |
|--------|--------|
|        | 0.0096 |
|        | 0.0046 |
|        |        |
|        |        |
|        |        |
|        | 0.0132 |
|        | 0.0380 |
| 0.0192 |        |
|        |        |
| 0.0040 | 0.0040 |
|        |        |
|        | 0.0284 |
|        |        |
| 0.0453 |        |
|        | 0.0101 |
|        |        |
|        |        |
|        | 0.0141 |
| 0.0014 |        |
| 0.0360 |        |
| 0.0125 |        |
|        | 0.0097 |
|        | 0.0075 |
|        | 0.0005 |
|        | 0.0399 |
|        | 0.0299 |
|        | 0.0070 |
|        | 0.0049 |
|        |        |
|        |        |
| 0.0397 |        |
| 0.0303 |        |
| 0.0372 | 0.0166 |
|        |        |
|        | 0.0096 |
|        |        |
| 0.0456 |        |
| 0.0206 |        |
|        |        |
| 0.0122 |        |
| 0.0149 |        |
|        |        |



|        |          |
|--------|----------|
| 0.0246 |          |
| 0.0233 |          |
|        | 3.41E-06 |
| 0.0249 |          |
| 0.0111 |          |
| 0.0122 |          |
|        | 0.0000   |
|        | 0.0384   |
|        |          |
| 0.0350 | 0.0350   |
|        |          |
| 0.0355 |          |
| 0.0192 |          |
| 0.0397 |          |
|        |          |
|        |          |
|        |          |
|        |          |
|        |          |
| 0.0106 |          |
|        |          |
| 0.0469 |          |
| 0.0378 |          |
|        |          |
|        |          |
|        | 0.0281   |
|        | 0.0104   |
| 0.0195 |          |
|        | 0.0386   |
|        |          |
|        |          |
|        | 0.0294   |
|        |          |
| 0.0461 |          |
|        |          |
|        |          |
|        |          |
|        | 0.0406   |
|        | 0.0214   |
|        |          |
| 0.0319 | 0.0319   |

|        |          |
|--------|----------|
| 0.0130 |          |
|        |          |
|        | 0.0114   |
|        |          |
| 0.0167 |          |
|        |          |
| 0.0039 |          |
|        |          |
|        | 0.0098   |
|        | 0.0002   |
| 0.0246 |          |
| 0.0158 |          |
|        |          |
| 0.0422 |          |
| 0.0188 |          |
| 0.0227 | 0.0304   |
|        |          |
| 0.0042 | 1.26E-05 |
|        |          |
|        |          |
|        |          |
| 0.0141 |          |
| 0.0089 |          |
|        |          |
|        |          |
|        |          |
|        | 0.0471   |
|        |          |
|        |          |
|        | 0.0265   |
|        | 0.0491   |
|        |          |
|        |          |
|        |          |
| 0.0486 |          |
| 0.0289 |          |
| 0.0166 |          |
|        | 0.0093   |
|        | 0.0262   |
|        | 0.0156   |
|        |          |
|        |          |
| 0.0108 |          |

|          |          |
|----------|----------|
|          | 0.0230   |
| 0.0111   | 0.0111   |
| 1.04E-07 |          |
|          |          |
| 0.0427   | 2.98E-22 |
|          |          |
|          | 0.0345   |
|          | 0.0297   |
| 0.0000   | 0.0098   |
|          |          |
|          |          |
|          |          |
| 0.0180   |          |
|          |          |
|          |          |
|          |          |
| 0.0002   |          |
| 0.0112   | 0.0160   |
|          | 0.0023   |
| 0.0362   |          |
| 0.0163   |          |
|          |          |
|          | 0.0385   |
|          | 0.0325   |
| 0.0191   |          |
| 0.0329   |          |
|          |          |
|          | 0.0284   |
|          | 3.13E-05 |
|          |          |
|          |          |
|          | 0.0035   |
| 0.0476   |          |
|          | 0.0217   |
|          |          |
|          |          |
|          |          |
|          | 0.0019   |
|          |          |
|          | 0.0086   |

|          |        |
|----------|--------|
|          |        |
| 0.0105   | 0.0104 |
| 0.0076   |        |
| 0.0000   |        |
|          |        |
|          | 0.0086 |
| 0.0221   |        |
| 0.0364   |        |
|          |        |
| 1.21E-10 |        |
| 0.0173   |        |
|          |        |
|          |        |
|          |        |
|          |        |
| 0.0433   |        |
|          |        |
| 0.0309   |        |
|          |        |
|          |        |
|          | 0.0363 |
| 0.0440   |        |
|          | 0.0452 |
| 0.0239   |        |
| 0.0335   |        |
| 0.0109   |        |
| 0.0251   |        |
|          |        |
|          | 0.0087 |
| 0.0062   |        |
| 0.0240   |        |
| 0.0081   |        |
| 0.0048   | 0.0095 |
|          |        |
|          |        |
|          |        |
|          |        |
|          | 0.0484 |
|          |        |
|          |        |
|          |        |

|        |          |
|--------|----------|
| 0.0164 | 0.0163   |
|        | 1.20E-07 |
|        |          |
|        | 0.0224   |
| 0.0301 |          |
|        |          |
|        |          |
| 0.0069 |          |
| 0.0151 |          |
| 0.0007 |          |
|        |          |
|        | 0.0383   |
| 0.0185 |          |
|        |          |
|        |          |
|        |          |
|        |          |
|        |          |
| 0.0086 | 0.0086   |
| 0.0105 |          |
|        |          |
|        |          |
| 0.0228 |          |
|        |          |
|        |          |
| 0.0079 | 0.0348   |
| 0.0152 |          |
|        |          |
|        |          |
| 0.0015 | 0.0019   |
|        | 0.0412   |
|        |          |
|        | 0.0267   |
|        |          |
| 0.0469 |          |
|        |          |
|        |          |
|        |          |
| 0.0326 |          |
|        |          |
